# Supplementary material
Source: PubMed Central journal article supplement (PMC3631640)
Supplement: 1217905110_pnas.201217905SI.pdf [file 1217905110_pnas.201217905SI.pdf]

# Supporting Information

Gonçalves et al. 10.1073/pnas.1217905110

**Table S1. Primers used for the amplification of mtDNA sequences on Botocudo DNA samples**

| Target region                        | Primer | Sequences (5'–3')                   | Ta* | Source |
|--------------------------------------|--------|-------------------------------------|-----|--------|
| HVS1                                 | L15989 | 5'- CCCAAAGCTAAGATTCTAAT -3'        | 60  | 1      |
|                                      | H16251 | 5'- GGAGTTGCAGTTGATGTGTGAT - 3'     | 60  | 1      |
| HVS1                                 | L16190 | 5'- CCCCATGCTTACAAGCAAGT -3'        | 60  | 1      |
|                                      | H16410 | 5'- GAGGATGGTGGTCAAGGGAC -3'        | 60  | 1      |
| HVSII                                | L00034 | 5'- GGGAGCTCTCCATGCATTTGGTATT -3'   | 60  | 1      |
|                                      | H00160 | 5'- CCTGTAATATTGAACGTAGGTGCGAT -3'  | 60  | 1      |
| 14022                                | L13981 | 5'- GCCCCTACTCCTCTAGACC -3'         | 60  | —      |
| 6719                                 | H14118 | 5'- GGGGAAGAAGAAAGAGAGGAAGT -3'     | 60  | —      |
|                                      | L6618  | 5'- CGGTCACCCTGAAGTTTATATTCTT -3'   | 60  | —      |
| 12239                                | H6829  | 5'- TAGCGGAGGTGAAATATGCTC -3'       | 60  | —      |
|                                      | L12192 | 5'- CGACCCCTTATTACCGAGA -3'         | 60  | —      |
| 15746                                | H12310 | 5'- TTTGGGGCCTAAGACCAAT- 3'         | 60  | —      |
|                                      | L15700 | 5'- GCCCACTAAGCCAATCACTT- 3'        | 59  | —      |
| 6905                                 | H15813 | 5'- CGGATGCTACTTGTCCAATG- 3'        | 59  | —      |
|                                      | L6809  | 5'- GAGCATATTTACCTCCGCTAC- 3'       | 60  | —      |
|                                      | H6952  | 5'- CGGTGAAAAGAAAGATGAATCC- 3'      | 60  | —      |
| Copenhagen Replication study primers |        |                                     |     |        |
| HVS1                                 | L16181 | 5'- CATAAAAACCCAATCCACATCAA -3'     | 46  | —      |
|                                      | H16204 | 5'- GAGGGTTGATTGCTGTACTTGC -3'      | 46  | —      |
| HVS1                                 | L16208 | 5'- CCCCCATGCTTACAAGCAAG -3'        | 46  | —      |
|                                      | H16221 | 5'- GTTGATGTGTGATAGTTGAGGG -3'      | 46  | —      |
| HVS1                                 | L16218 | 5'- CAACCTCAACTATCACACATC -3'       | 46  | —      |
|                                      | H16267 | 5'- AGGTTTGTGGTATCCTAGTGG -3'       | 46  | —      |
| HVS1                                 | L16171 | 5'- GACCACCTGTAGTACATAAAAACCCAA -3' | 55  | —      |
|                                      | H16225 | 5'- GTTGCAAGTTGATGTGTGATAGTTG -3'   | 55  | —      |
| HVSII                                | L00034 | 5'- GGGAGCTCTCCATGCATTTGGTATT -3'   | 60  | —      |
|                                      | H00160 | 5'- CCTGTAATATTGAACGTAGGTGCGAT -3'  | 60  | —      |
| 9bp-deletion                         | LB     | 5'- AGGGCCCGTATTTACCCTAT -3'        | 60  | —      |
|                                      | HB     | 5'- CTAAGTTAGCTTTACAGTGGGCTC -3'    | 60  | —      |
| 14022                                | L13981 | 5'- GCCCCTACTCCTCTAGACC -3'         | 60  | —      |
|                                      | H14118 | 5'- GGGGAAGAAGAAAGAGAGGAAGt -3'     | 60  | —      |
| Cloning                              | M13F   | 5'- GTAAAACGACGGCCAG -3'            | 55  | —      |
|                                      | M13R   | 5'- CAGGAAAACAGCATGAC -3'           | 55  | —      |

HVS1-HVSII, first and second hypervariable segments.

\*Annealing temperature (°C).

1. Gonçalves VF, et al. (2010) Recovering mitochondrial DNA lineages of extinct Amerindian nations in extant homopatric Brazilian populations. *Investig Genet* 1(1):13.

**Table S2. Restriction fragment-length polymorphism primers with respective annealing temperatures**

| Target region | Primer | Primer sequences (5'–3')*        | Enzyme\defining marker     | Ta (°C) |
|---------------|--------|----------------------------------|----------------------------|---------|
| Hg A          | L607   | 5'- CACTGAAAAATGTTTAGACGGG -3'   | HaeIII 663 (+)             | 60      |
|               | H707   | 5'- GGGATGCTTGCATGTGTAATC -3'    |                            |         |
| Hg B          | L8209  | 5'- CATCGTCCTAGAATTAATTCC -3'    | 9-bp deletion <sup>†</sup> | 60      |
|               | H8304  | 5'- CTTACAGTGGGCTCTAGAGG -3'     |                            |         |
| Hg C          | L13209 | 5'- CGCCCTTACACAAAATGACATCAA -3' | <i>AluI</i> 13262 (+)      | 60      |
|               | H13301 | 5'- GGTTGGTTGATGCCGATTGTA -3'    |                            |         |
| Hg D          | L5150  | 5'- CCTACTACTATCTCGCACCTG -3'    | <i>AluI</i> 5176 (-)       | 60      |
|               | H5217  | 5'- AGAGGAGGGTGGATGGAATTA -3'    |                            |         |

\*All primers sequences were obtained from the literature (1).

<sup>†</sup>Between *COII* and *tRNA* (Lys) genes in the coding region of the mtDNA.

1. Alves-Silva J, et al. (2000) The ancestry of Brazilian mtDNA lineages. *Am J Hum Genet* 67(2):444–461.
